# 1 **Poor availability of context-specific evidence hampers decision-** 2 **making in conservation**

3  
4 Authors:

5 Alec P. Christie<sup>1</sup> (Corresponding author: [apc58@cam.ac.uk](mailto:apc58@cam.ac.uk)),  
6 Tatsuya Amano<sup>1,3</sup>,  
7 Philip A. Martin<sup>1,2</sup>,  
8 Silviu O. Petrovan<sup>1</sup>,  
9 Gorm E. Shackelford<sup>2</sup>,  
10 Benno I. Simmons<sup>1,4,5</sup>,  
11 Rebecca K. Smith<sup>1</sup>,  
12 David R. Williams<sup>6</sup>,  
13 Claire F. R. Wordley<sup>1</sup> and  
14 William J. Sutherland<sup>1,2</sup>.

15  
16 Affiliations:

17 <sup>1</sup>Conservation Science Group, Department of Zoology, University of Cambridge, The David  
18 Attenborough Building, Downing Street, Cambridge CB3 3QZ, UK.

19 <sup>2</sup>BioRISC, St. Catharine's College, Cambridge CB2 1RL, UK.

20 <sup>3</sup>School of Biological Sciences, University of Queensland, Brisbane, 4072 Queensland,  
21 Australia.

22 <sup>4</sup>Department of Animal and Plant Sciences, University of Sheffield, Sheffield, S10 2TN United  
23 Kingdom.

24 <sup>5</sup>Centre for Ecology and Conservation, College of Life and Environmental Sciences, University  
25 of Exeter, Penryn, UK

26 <sup>6</sup>Sustainability Research Institute, School of Earth and Environment, University of Leeds. LS2  
27 9JT United Kingdom

28  
29 Running title: Lack of relevant evidence limits conservation

30  
31 Keywords: conservation evidence, conservation intervention, evidence-based conservation,  
32 external validity, generalizability, local context, prioritization, relevant evidence, study design,  
33 synthesis

34  
35  
36  
37  
38  
39  
40  
41  
42  
43

44 Abstract

45  
46  
47  
48  
49  
50  
51  
52  
53  
54  
55  
56  
57  
58  
59  
60  
61  
62  
63  
64  
65  
66  
67  
68  
69  
70  
71  
72  
73  
74  
75  
76  
77  
78  
79  
80  
81  
82  
83

Evidence-based conservation relies on robust and relevant evidence. Practitioners often prefer locally relevant studies whose results are more likely to be transferable to the context of planned conservation interventions. To quantify the availability of relevant evidence for amphibian and bird conservation we reviewed Conservation Evidence, a database of quantitative tests of conservation interventions. Studies were geographically clustered and found at extremely low densities - fewer than one study was present within a 2,000 km radius of a given location. The availability of relevant evidence was extremely low when we restricted studies to those studying biomes or taxonomic orders containing high percentages of threatened species, compared to the most frequently studied biomes and taxonomic orders. Further constraining the evidence by study design showed that only 17-20% of amphibian and bird studies used robust designs. Our results highlight the paucity of evidence on the effectiveness of conservation interventions, and the disparity in evidence for local contexts that are frequently studied and those where conservation needs are greatest. Addressing the serious global shortfall in context-specific evidence requires a step change in the frequency of testing conservation interventions, greater use of robust study designs and standardized metrics, and methodological advances to analyze patchy evidence bases.

## 84 Introduction

85

86 Tackling the biodiversity crisis with limited resources requires efficient and effective  
87 conservation action (Dirzo et al., 2014; Sutherland, Pullin, Dolman, & Knight, 2004). To inform  
88 which conservation actions ('interventions') are effective and which are not, we need a large and  
89 robust evidence base, ideally including large numbers of studies (replication of evidence;  
90 Fig.1A) with high internal validity (quality; Fig.1A) and external validity (relevance; Fig.1A).  
91 However, the limited resources available for conservation research mean that the evidence  
92 base for conservation is geographically and taxonomically biased (Christie, Amano, Martin,  
93 Petrovan, et al., 2019; Fazey, Fischer, & Lindenmayer, 2005; Hickisch et al., 2019; Spooner,  
94 Smith, & Sutherland, 2015). This is likely to limit the quality and relevance of evidence and  
95 impair effective decision-making (Cook, Possingham, & Fuller, 2013). Quantifying the availability  
96 of relevant, reliable studies is necessary to understand the strength of evidence upon which  
97 decisions are made, and to prioritize research on the effectiveness of conservation  
98 interventions.

99 Practitioners and policymakers typically prefer to base their decisions on studies that are  
100 relevant (i.e., with high external validity; Fig.1) to their local context (Addison, Cook, & de Bie,  
101 2016; Cook & Sgrò, 2017; Geijzendorffer et al., 2017). Using context-specific studies as  
102 evidence helps to ensure that results are likely to be repeated if the intervention is implemented  
103 again. The relevance of conservation studies to a given context will span multiple dimensions,  
104 including: (i) bioclimatic (i.e., similarity between habitats or regions); (ii) taxonomic/functional  
105 (i.e., similarity between taxa in terms of ecological function or taxonomic groups); and (iii) which  
106 metric was used to quantify the effectiveness of an intervention (i.e., the response variables or  
107 metrics of interest; Fig.1B). Other dimensions may also be important, such as the similarity  
108 between a study's and a practitioner's socioeconomic and political contexts, but we focus on the  
109 three dimensions above.

110

111

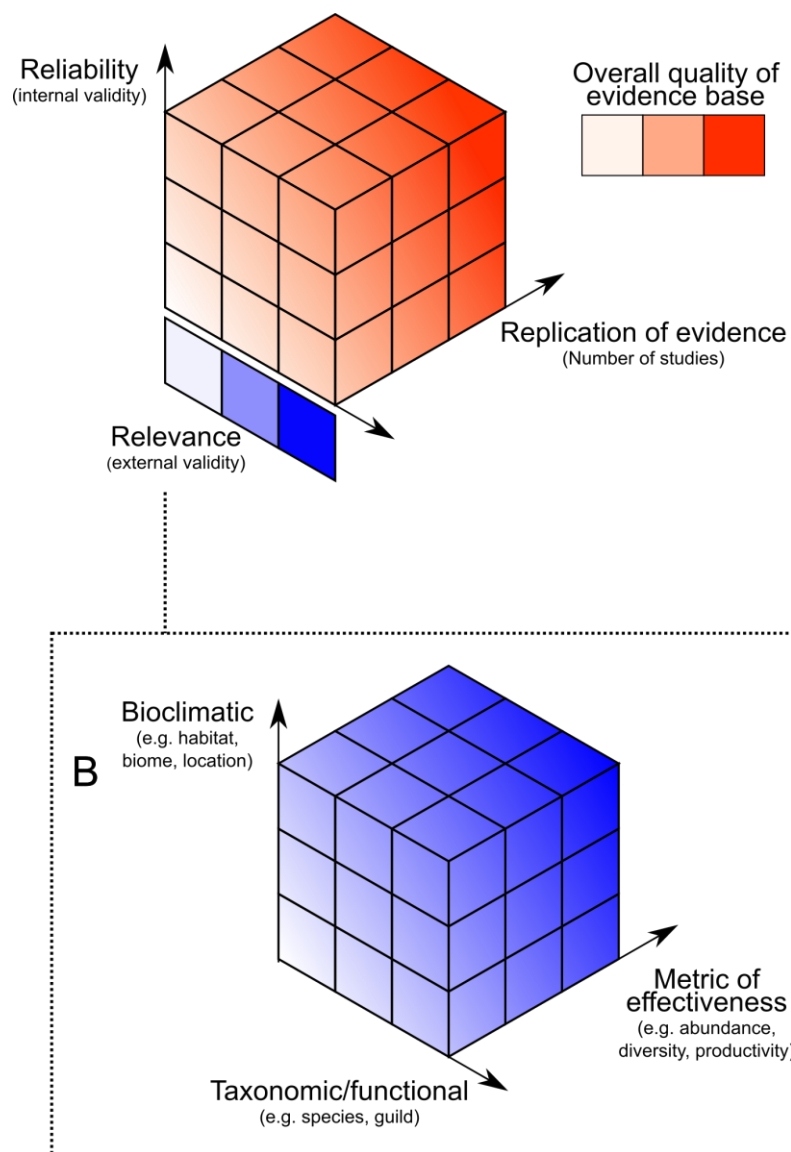

112

113 Figure 1 - Framework of the desirable aspects of an ideal evidence base (stronger colors =  
114 more desirable). Fig.1A shows the three major desirable factors that an evidence base should  
115 have; large replication of evidence that is highly reliable (high internal validity) and highly  
116 relevant (high external validity). Fig.1B refers to the three dimensions that we will focus on that  
117 influence the overall relevance of evidence: i) bioclimatic (e.g., the study system), ii)  
118 taxonomic/functional (the study taxa) and iii) effectiveness measure (how you define and  
119 measure conservation success).

120 The first of these dimensions - bioclimatic relevance - refers to the similarity between the study  
121 ecosystem and the practitioner's ecosystem (Fig.1B). The second dimension -  
122 taxonomic/functional relevance - concerns the similarity between the focal taxa of a study and  
123 the taxa of interest to the practitioner (Fig.1B). Together, these determine the ecological  
124 similarity between study and practitioner local contexts. This is vital because responses to  
125 interventions will vary between ecosystems and taxa. For example, the effectiveness of artificial

126 nest boxes varies between different countries and habitats (Finch et al., 2019), while the  
127 effectiveness of translocation for New Zealand robins (*Petroica australis*) is unlikely to be  
128 relevant to a practitioner translocating Kakapo (*Strigops habroptila*). Practitioners who are  
129 interested in broader functional groups (e.g., seed dispersers or pollinators), taxa (e.g., birds,  
130 amphibians), or even whole ecosystems, may focus more on the functional relevance rather  
131 than taxonomic similarity of studied species.

132 The third dimension of relevance is the metric used to measure the effectiveness of an  
133 intervention. Practitioners may be interested in different responses to interventions depending  
134 on their focus (e.g., species or ecosystem-level responses) and effectiveness may vary  
135 depending on the metric used (Capmourteres & Anand, 2016; Marshall, Wintle, Southwell, &  
136 Kujala, 2019). For example, at the ecosystem-level, the effectiveness of bird boxes may be  
137 measured using the species richness or diversity of birds using them (Caine & Marion, 1991),  
138 while at the species-level, the number of individuals (Brawn & Balda, 1988), fledglings (Male,  
139 Jones, & Robertson, 2006; Purcell, Verner, & Lewis W, 1997), or brood size (Browne, 2006)  
140 may be measured. Similarly, the effectiveness of road mitigation interventions (e.g., tunnels or  
141 bridges) may be measured by the numbers of individuals of different species using the  
142 structures, but could also be measured in terms of levels of road mortality (Helldin & Petrovan,  
143 2019). Therefore, the type of metric used by studies to measure effectiveness can have a major  
144 influence on the relevance of evidence.

145 The reliability of an evidence base - the internal validity of its studies - ultimately determines the  
146 overall quality of the evidence base and depends to a large extent on study design (Christie,  
147 Amano, Martin, Shackelford, et al., 2019; De Palma et al., 2018; Spake & Doncaster, 2017). As  
148 the conservation evidence base contains a wide variety of study designs (De Palma et al.,  
149 2018), there is likely to be variation in the reliability of inferences that can be drawn (Christie,  
150 Amano, Martin, Shackelford, et al., 2019). This variation may lead scientists to make misleading  
151 recommendations to practitioners, ultimately reducing the effectiveness of conservation  
152 practice, and making it difficult for decision-makers to weigh the strength of evidence provided  
153 by different studies.

154 The replication of evidence - the number of studies in the evidence base - is also important as  
155 greater numbers of studies demonstrating repeatable and reproducible effectiveness will give us  
156 greater confidence in the overall strength of the evidence. Decision-makers should rightly be  
157 wary of basing decisions on a low number of studies where reproducible effectiveness has not  
158 been or cannot be demonstrated - particularly given the current reproducibility crisis (Begley &  
159 Ioannidis, 2015; Nosek & Errington, 2017; Open Science Collaboration, 2015). However, the  
160 overall number of studies is not the only indicator of the strength of the evidence, since studies  
161 with low internal validity (e.g., poor study designs) and/or external validity (i.e., low relevance)  
162 may not constitute reliable evidence. Currently, we have a poor quantitative understanding of  
163 the availability of relevant and reliable studies in the conservation literature.

164 In this study, we assess whether studies testing conservation interventions are distributed  
165 across different contexts (bioclimatically, taxonomically, and by the metric used to measure  
166 effectiveness) in ways that reflect the needs of conservation. We also quantify other desirable

167 aspects of the evidence base for conservation in terms of the quantity and quality of available  
168 studies; i.e., the number of studies that have tested different conservation actions, and how  
169 many of these use robust study designs.

170

## 171 **Methods**

172

### 173 **Conservation Evidence database**

174

175 We assessed the availability of relevant evidence for conservation practice using Conservation  
176 Evidence, a database of 5,525 publications as of January 2020 (Conservation Evidence, 2020a)  
177 that have quantitatively assessed the effectiveness of conservation interventions. Interventions  
178 are defined as management actions that a practitioner may undertake to benefit biodiversity  
179 (see Sutherland et al. (2019) for detailed methods). When we refer to the number of studies per  
180 intervention, we refer to the number of different tests of interventions - single publications may  
181 report multiple tests of different interventions. We assessed the availability of evidence for  
182 amphibians and birds based on synopses compiled in 2014 (n=419 studies; Smith &  
183 Sutherland, 2014) and 2012 (n=1,232 studies; Williams et al., 2013), respectively. More recent  
184 publications will obviously have increased the evidence base, but the broad patterns we quantify  
185 are unlikely to have changed in the intervening years. We excluded meta-analyses or  
186 systematic reviews from our analyses as these typically cannot be attributed to a particular local  
187 context (e.g., biome or taxon). We also only included interventions for which studies were  
188 present in the database. Since 32% (n=33) of interventions for amphibians and 25% (n=80) of  
189 interventions for birds had no associated studies in the database (i.e., were untested or tests  
190 were unpublished) or only included reviews or meta-analyses, the following analyses are likely  
191 to be an optimistic assessment of the availability of evidence in conservation. We used R  
192 statistical software version 3.5.1 (R Core Team, 2019) for all analyses.

193

194

### 195 **Local availability of studies by geographical distance**

196

197 To calculate the average availability of studies within a certain distance of a given practitioner's  
198 location, we generated 1,000 regularly spaced coordinates across certain parts of the world. For  
199 amphibians, we spaced these coordinates over the combined extent of all amphibian species  
200 ranges (IUCN, 2019) as this represents the possible range of locations in which a practitioner  
201 might conduct an intervention to conserve amphibians. For birds, we spaced these coordinates  
202 across the world's terrestrial land masses (using "OpenStreetMap" 2019; see Appendix S1 for  
203 maps of coordinates) since although the combined distribution of all bird species is almost  
204 global, most practitioners are likely to conduct interventions to conserve birds terrestrially.  
205 Although non-terrestrial interventions are carried out by practitioners, the vast area covered by  
206 the ocean would severely underestimate the availability of studies to a practitioner's likely  
207 location. 19 non-terrestrial interventions for birds were found in the database (e.g., 'use  
208 streamer lines to reduce seabird bycatch on longlines' or 'use high-visibility mesh on gillnets to  
209 reduce seabird bycatch') containing 33 studies in total - these were still included in our analysis

210 as these studies tended to be conducted within close proximity to a terrestrial landmass (i.e.,  
211 coastal).

212  
213 We then calculated the Great Circle Distance from each study to each coordinate (see Appendix  
214 S1 for details), binning distances into a series of categories (100 km, 1,000 km and then every  
215 1,000 km up to and including 19,000 km). We also calculated the 'Global Mean', which is the  
216 mean number of studies per intervention in the entire database - equivalent to approximately  
217 20,000 km at the equator, the maximum distance separating any two coordinates. We then  
218 calculated the mean number of studies within each distance bin across all coordinates, as well  
219 as the number of studies that used different categories of study designs: i) any design, ii)  
220 Before-After (BA), Control-Impact (CI), Before-After Control-Impact (BACI) or Randomized  
221 Controlled Trial (RCT); iii) CI, BACI or RCT; iv) BACI or RCT designs (see Methods in Christie,  
222 Amano, Martin, Petrovan, et al. 2019 for definitions of each design).

223  
224 We then repeated this analysis using the same number of coordinates (n=1,000), but this time  
225 by randomly selecting coordinates from amphibian and bird studies in the database (sampling  
226 with replacement from amphibian studies as there were fewer than 1,000). Using both  
227 approaches provided likely upper and lower bounds of evidence availability: regular coordinates  
228 likely underestimated the availability of evidence to practitioners, giving equal weighting to  
229 locations where conservation interventions are unlikely to occur (e.g., Antarctica) and those that  
230 are more intensively managed (e.g., Europe). In contrast, using locations from existing  
231 publications will likely overestimate study availability as this assumes that practitioners only  
232 conduct interventions in locations where they have previously been tested.

233  
234 We compared the results of the first analysis (regularly spaced coordinates) to the expected  
235 patterns we would observe if studies were regularly distributed. We did this by generating equal  
236 numbers of regularly spaced coordinates ('expected studies') as the number of amphibian and  
237 bird studies (419 and 1,232 coordinates, respectively) using the same methods and shapefiles  
238 as before. We then calculated the mean number of these 'expected studies' within each  
239 distance bin.

#### 240 241 **Context-specific availability of studies**

242  
243 To quantify the amount of relevant and robust evidence on the effectiveness of different  
244 conservation interventions, we required metadata that described each study's local context and  
245 study design. By adapting previously described methods (Christie, Amano, Martin, Petrovan, et  
246 al. 2019; Appendix S2), we extracted the biome, taxonomic order and reported metric type used  
247 by each study (to quantify the number of relevant studies), as well as the broad category of  
248 study design used (to quantify the number of robustly designed studies). When metric metadata  
249 was extracted, we grouped similar metrics into the following nine metric types: count-based,  
250 diversity, activity-based, physiological, survival, reproductive success, education-based,  
251 regulation-based, and biomass (Appendix S2).

252

253 We quantified the number of studies per conservation intervention that met certain relevance  
254 and study design criteria, to give an estimate of the availability of relevant and robust evidence.  
255 To ensure that we did not artificially constrain the number of studies per intervention for different  
256 subsets of studies (e.g., taxonomic order or biome), we grouped certain interventions that were  
257 focused on single taxa or habitats but were fundamentally the same type of intervention (e.g.,  
258 'create ponds for newts' and 'create ponds for toads' would be grouped into 'create ponds'; see  
259 Acknowledgements and Data for files describing these groupings). This resulted in a total of 71  
260 and 226 interventions for amphibians and birds, respectively.

261  
262 Using these interventions, we then undertook two analyses to quantify the availability of  
263 evidence under different scenarios: i) where we optimistically assume a given practitioner is  
264 interested in the most frequently studied local context; and ii) where we assume that a given  
265 practitioner is interested in local contexts in which a greater percentage of species are  
266 threatened (i.e., those classified as Vulnerable, Endangered or Critically Endangered status on  
267 the (IUCN, 2019) Red List).

268  
269 The first analysis calculated the mean number of studies per intervention for both scenarios in  
270 terms of three separate relevance criteria: biome, taxonomic order and metric. For the first  
271 scenario we calculated the number of studies with the most frequently studied biome, order or  
272 metric relative to each intervention. For the second scenario (to reflect conservation needs), we  
273 calculated the number of studies with a randomly selected biome, taxonomic order or metric  
274 from a weighted list (averaged over 1,000 repeated runs). This weighted list was generated so  
275 that the probability of selection was determined by the percentage of species that are  
276 threatened (i.e., those classified as Vulnerable, Endangered or Critically Endangered status on  
277 the (IUCN, 2019) Red List) for each biome and taxonomic order, and the percentage usage of  
278 each metric within each intervention in the database. We intersected shapefiles from the (IUCN,  
279 2019) Red List with shapefiles of the world's terrestrial biomes (Dinerstein et al., 2017) to  
280 determine the proportion of threatened species in each biome. We assumed that interventions  
281 could be tested by studies in any biome and on any taxonomic order - this will likely mean that  
282 our estimates for the second scenario are underestimates of study availability, for example, as  
283 certain interventions are unlikely to be conducted in certain biomes. However, we grouped  
284 interventions so they were not defined as taxon or habitat-specific and used coarse criteria  
285 (biome and taxonomic order) to limit this underestimation.

286  
287 For the second analysis, we used a stepwise process to calculate the number of studies that  
288 met one or more of the relevance criteria - only carrying forward studies if they met all previous  
289 criteria. For example, considering the first scenario (most frequently studied context), we  
290 counted the number of studies featuring the most frequently studied biome, then studies  
291 featuring the most frequently studied biome AND taxonomic order, and then studies featuring  
292 the most frequently studied biome AND taxonomic order AND metric. We also repeated this for  
293 all possible orderings of biome, taxonomic order and metric (Fig.3 and Figs.S1-S5), as well as  
294 for the second scenario (weighting towards biomes and taxonomic orders with greater  
295 percentages of threatened species). Taxonomic orders could only be selected if at least one  
296 species in that order was present in the previously selected biome - we determined which



297 orders were present in each biome by intersecting shapefiles from the (IUCN, 2019) Red List  
298 with shapefiles of terrestrial biomes (Dinerstein et al., 2017). The same was true for biomes  
299 when taxonomic order was the first relevance criteria to be selected (i.e., only biomes where  
300 that taxonomic order is present could be selected). In the final step, we also calculated the  
301 number of studies that used different categories of study designs (any design; BA, CI, BACI or  
302 RCT; CI, BACI or RCT; BACI or RCT).

303

304

## 305 **Results**

306

307 We considered a total of 71 and 226 interventions for amphibians and birds (mean = 7.9 and 6.9  
308 studies per intervention; Fig.2), respectively, that contained at least one study. Studies were not  
309 evenly distributed geographically; the mean number of amphibian and bird studies per  
310 intervention (black large circles in Fig.2) deviated, particularly for amphibians, from what we  
311 would have expected if the same number of studies were regularly distributed (orange triangles  
312 in Fig.2). On average, there was less than one study per intervention available within 2,000km  
313 from a given regular point. When restricting analyses to more robust designs, the availability of  
314 studies decreased substantially, with a higher proportion of amphibian studies using BA  
315 designs, compared to birds, but a smaller proportion using CI (see drop-offs from orange to  
316 blue, and blue to green lines, respectively; Fig.2).

317

318 When considering distance of studies to randomly selected study coordinates, the mean  
319 number of studies per intervention generally declined more gradually compared to a regular grid  
320 of coordinates (Fig.2), implying that studies are clustered in space. At distances below 5,000km  
321 these differences were particularly pronounced; for example, on average, 2.2 amphibian studies  
322 and 1.5 bird studies were within 2,000km of a random study coordinate, compared to only 0.3  
323 amphibian studies and 0.2 bird studies within 2,000km of regularly spaced coordinate. This  
324 suggests that studies are slightly more clustered for amphibians than birds.

325

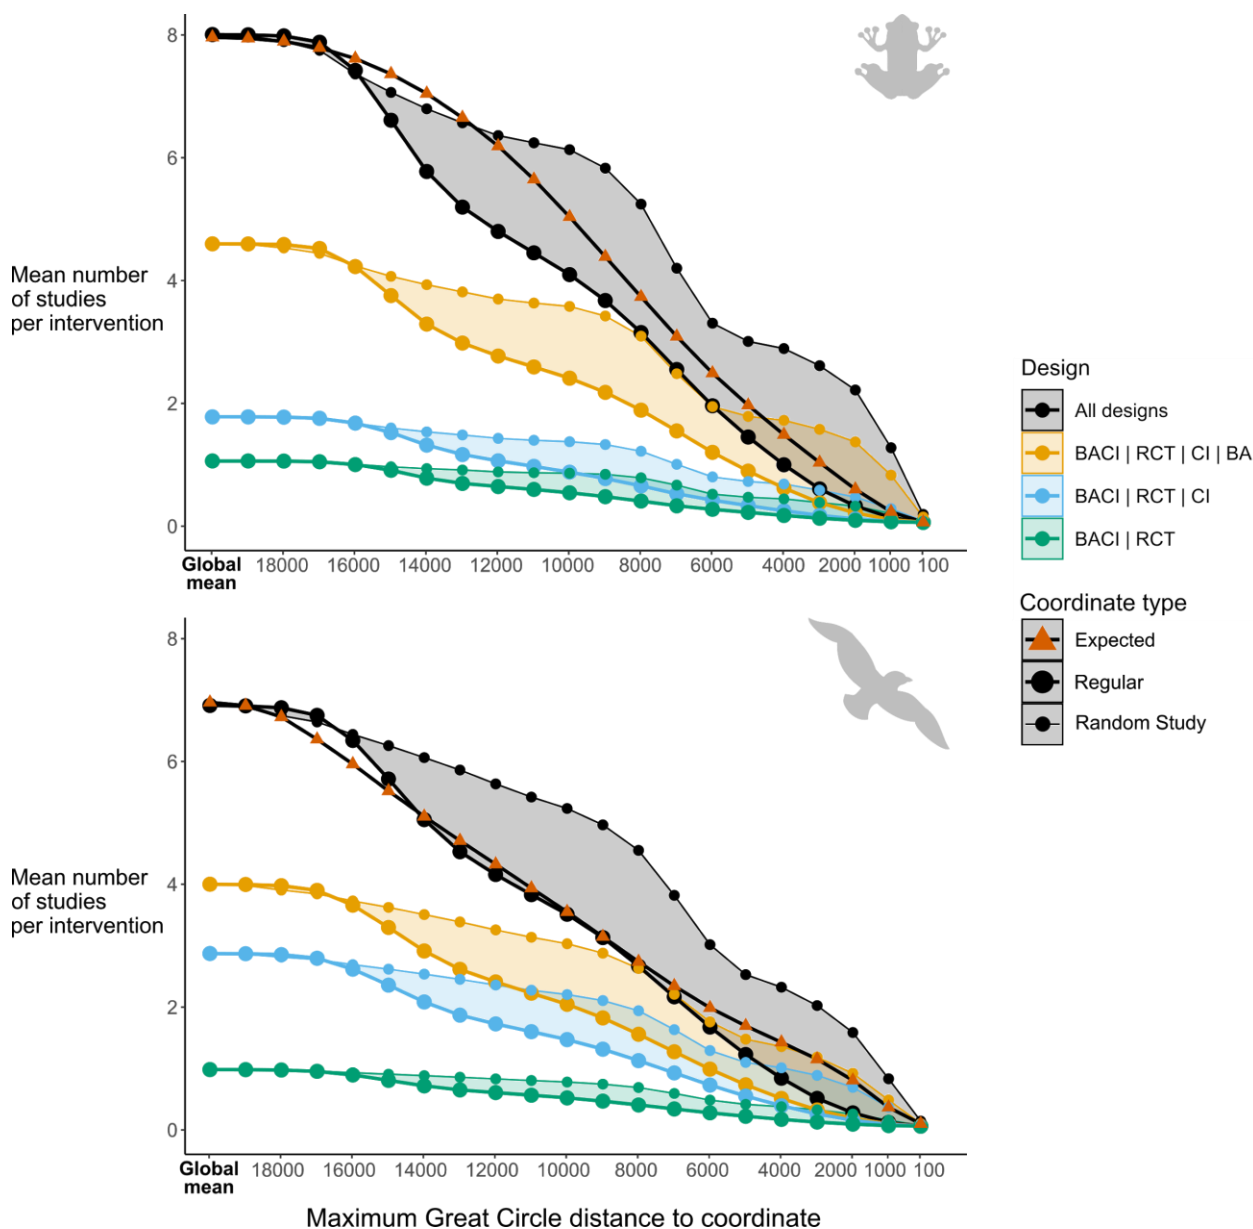

326  
327

328 Figure 2 - The mean number of amphibian and bird studies per intervention using different study  
329 designs found within a certain distance of different sets of coordinates. The maximum distance  
330 that a study can be is shown on the x axis, starting with the Global Mean (mean number of  
331 studies per intervention considering all studies in the database) and decreasing to a distance of  
332 100 km. Regular coordinates (large circle, thick line) show the mean number of studies within a  
333 certain distance from a set of regularly distributed coordinates. Expected coordinates (orange  
334 triangle) mimic how the availability of studies would be expected to change if studies were  
335 regularly distributed (this is only shown for studies using any study design). Random Study  
336 coordinates (small circle, thin line) show the mean number of studies within a certain distance  
337 from a set of randomly selected coordinates where previous studies have been conducted.

338  
339

340 The mean number of studies per intervention was substantially greater for the most frequently  
341 studied biome (Amphibians: 5.0; Birds: 3.5), relative to each intervention, compared to biomes  
342 with higher percentages of species that are threatened (Amphibians: 0.4; Birds: 0.4; Fig.3).  
343 Similarly, the mean number of studies per intervention was substantially greater for the most  
344 frequently studied order in each intervention (Amphibians: 7.2; Birds: 4.4), compared to a  
345 taxonomic orders with higher percentages of species that are threatened (Amphibians: 0.4;  
346 Birds: 0.01; Fig.3). There was a smaller difference in the mean number of studies per  
347 intervention between studies that used the most frequently used metric (Amphibians: 5.2; Birds:  
348 4.8), relative to each intervention, and studies that used a randomly selected metric from within  
349 each intervention (Amphibians: 4.5; Birds: 3.9; Fig.3). The mean numbers of biomes, taxonomic  
350 orders and metrics per intervention were 2.7, 2.6, and 3.1 for amphibians, respectively, and 2.4,  
351 6.1, and 2.6 for birds, respectively.  
352  
353  
354

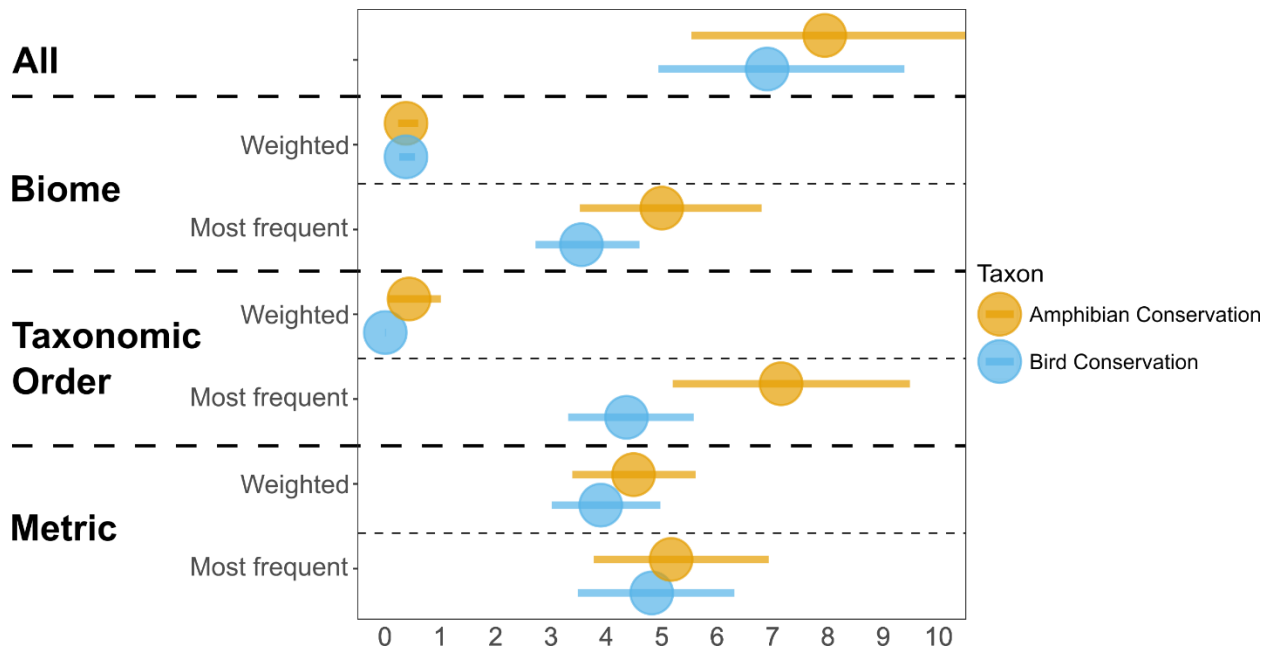

355  
356 Figure 3 - Mean number of studies per intervention when studies were counted based on  
357 whether they considered the most frequently studied biome, metric or order, and whether they  
358 considered a randomly selected biome, metric or taxonomic order from a weighted list. These  
359 weightings were based on the proportion of threatened species found in each biome or  
360 taxonomic order. 'All' indicates the mean number of studies per intervention when considering  
361 all studies.  
362

363 The mean number of studies per intervention was also greater when we constrained by the  
364 most frequently studied biome, taxonomic order and metric in a stepwise process Fig.4A),  
365 compared to biomes and taxonomic orders with higher percentages of threatened species  
366 (Fig.4B). When we constrained by the most frequently studied biome, taxonomic order and  
367 metric, the greatest proportional decrease in the number of studies occurred once we further  
368 constrained by study design, by only counting studies using robust BACI or RCT designs (on

369 average, ~20% of amphibian studies and ~17% of bird studies that had met all previous criteria;  
370 Fig.4A). When we constrained by biomes and taxonomic orders with higher percentages of  
371 threatened species, the greatest proportional decreases occurred when constraining by  
372 taxonomic order, most notably for birds, and by biome (Fig.4B).

373

374 The sequence in which criteria were applied did not substantially affect the magnitude of the  
375 decrease in the number of studies - e.g., when biome was selected before or after taxonomic  
376 order and metric (Supporting Information Fig.S1-5). The overall decrease in studies from  
377 applying all relevance criteria (biome, taxonomic order and metric) was similarly severe  
378 regardless of the sequence in which the criteria were applied (Supporting Information Fig.S1-5).  
379 For all sequences, constraining the evidence to studies that used robust BACI or RCT designs  
380 reduced the mean number of studies to less than one study after constraining by the most  
381 frequently studied biome, taxonomic order and metric (Fig.4A; Supporting Information Fig.S1-5).  
382 Doing the same after instead constraining by the biomes and taxonomic orders with higher  
383 percentages of threatened species reduced the mean number of studies to fewer than 0.01  
384 studies with BACI or RCT designs (Fig.4B; Supporting Information Fig.S1-5).

385

386

387

388

389

390

391

392

393

394

395

396

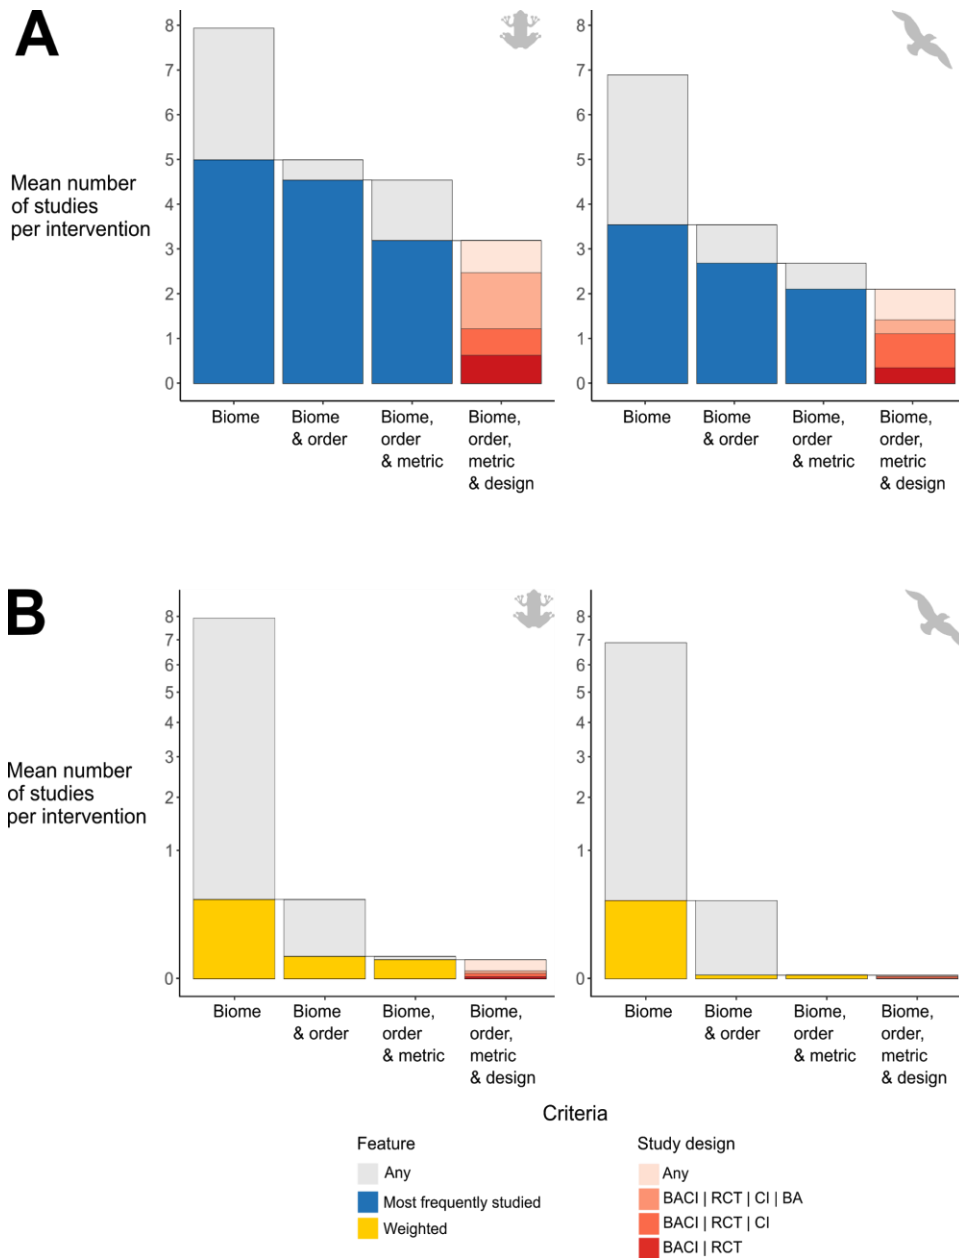

397

398

399

400

401

402

403

404

405

406

407

408

409

Figure 4 - Mean numbers of amphibian and bird studies per intervention when only considering studies that meet certain relevance criteria. In panel A, studies with the most frequently studied biome, taxonomic order and metric relative to each intervention were counted - here we assume practitioners are interested in the most frequently studied local context. At each step (left to right) we add a further criterion, carrying forward relevant studies from the previous step - for example, only studies conducted in the most frequently studied biome were carried forward into the biome and order category. In panel B, studies with a selected biome, taxon and metric were counted (y axis has a square root transformation). Here we assume practitioners are more likely to be interested in: biomes that are inhabited by higher proportions of threatened species; taxonomic orders that have higher relative proportions of threatened species; and metrics that are most frequently used within each intervention. At the final step, studies are counted based on the study design they use (see Methods for details of study designs).

## 410 Discussion

411  
412 Our work demonstrates that not only is there a general paucity of studies testing conservation  
413 interventions, but that the distribution of these studies does not reflect conservation needs.  
414 Specifically, there is a lack of studies testing conservation interventions in biomes and for  
415 taxonomic orders containing high percentages of threatened amphibian and bird species. Given  
416 substantial declines of bird fauna (Rosenberg et al., 2019) and severe threats to amphibians  
417 (Grant, Muths, Schmidt, & Petrovan, 2019), a better understanding of the effectiveness of  
418 interventions targeting threatened species is urgently required. Furthermore, a given decision-  
419 maker is likely to struggle to find robust studies addressing their local context. Addressing this  
420 deficit will be challenging, but there are several possible ways to improve the evidence base for  
421 conservation.

422  
423 A fundamental problem that needs to be overcome in the long-term is the lack of studies testing  
424 conservation interventions. Williams, Balmford, & Wilcove (*in review*) found that only 15% of  
425 studies from a representative sample of the conservation literature tested interventions.  
426 Evaluation of interventions should become mainstream, both as a topic of academic research  
427 and as an activity for on-the-ground conservationists (Baylis et al., 2016). The publication of  
428 these tests, whether the results are positive, negative, or neutral, is critical to building a strong  
429 evidence base for conservation (Catalano, Lyons-White, Mills, & Knight, 2019). Current efforts  
430 to facilitate this include the Applied Ecology Resources repository (British Ecological Society,  
431 2020), 'Evidence' articles in the journal *Conservation Science and Practice* (Society for  
432 Conservation Biology, 2020), and the journal *Conservation Evidence* (Conservation Evidence,  
433 2020b).

434  
435 Simply publishing more tests of conservation interventions, even at an increasing rate, is  
436 however unlikely to solve the paucity of locally relevant studies. For example, even though  
437 adding 1,000 studies testing interventions on birds would increase the mean number of studies  
438 to approximately 11 studies across the current 226 interventions, these studies would still be  
439 spread thin across a myriad of local contexts where the need for conservation is often not the  
440 greatest (see also Wilson et al., 2016). Although Reboredo Segovia, Romano, & Armsworth  
441 (2020) suggest that the number of general conservation studies in tropical locations correlates  
442 with the number of threatened species, the results of this study and (Christie, Amano, Martin,  
443 Petrovan, et al., 2019) suggest this is not the case for conservation studies testing interventions.  
444 Therefore, we need concrete solutions enabling conservationists to generate and collate more  
445 experimental evidence on the effectiveness of conservation interventions in underrepresented  
446 locations and on underrepresented taxa (Christie, Amano, Martin, Petrovan, et al., 2019;  
447 Donaldson et al., 2016; Murray, Green, Williams, Burfield, & de Brooke, 2015). For example,  
448 funders, principal investigators and heads of conservation organizations need to enhance and  
449 prioritize funding to test interventions in underrepresented areas. Evidence synthesis also needs  
450 to incorporate more evidence from non-English language and grey literature publications to help  
451 address underrepresented local contexts (Amano, González-Varo, & Sutherland, 2016; Amano  
452 & Sutherland, 2013) - for example, publications from over 317 non-English language journals  
453 are starting to be added to the Conservation Evidence database through the Transcending

454 Language Barriers to Environmental Sciences project (TRANSLATE, 2020). Making concerted  
455 efforts to acquire grey literature from organizations and groups outside academia will also be  
456 important.

457  
458 The low proportion of studies using robust study designs, regardless of their relevance to a local  
459 context, is also challenging. That more robustly designed studies are concentrated in North  
460 America, Europe and Australia also compounds earlier taxonomic and biogeographical biases  
461 (Christie, Amano, Martin, Petrovan, et al., 2019). If few robustly designed studies are available  
462 for informing conservation, decision-makers may have to consider a wider range of studies that  
463 may be less robust or relevant, potentially reducing the effectiveness of decision-making and  
464 future practice (Slavin, 1995; Tugwell & Haynes, 2006; Whittaker, 2010). To increase the quality  
465 of studies available for decision-making, we must recognize that the quality of studies testing  
466 interventions may be limited in different ways. Studies evaluating mitigation efforts are often not  
467 constrained by cost, but rather by short timescales and their focus on meeting legislative  
468 requirements (for example, conserving legally protected species). Studies testing non-mitigation  
469 interventions will likely be more constrained by cost, as well as short timescales (e.g., PhD  
470 funding). Acknowledging how real-world constraints affect the choice of study design is  
471 essential to devising approaches to improving the evidence base for conservation. While better  
472 training of early career scientists, consultants and researchers in appropriate study designs for  
473 causal inference may help, ultimately more regulatory and funder-led measures (e.g., requiring  
474 grantees to demonstrate rigorous study design) will be required (De Palma et al., 2018; Grant et  
475 al., 2019).

476  
477 Given the general lack of evidence across conservation, there is also a need to use a  
478 standardized set of metrics to evaluate conservation effectiveness (McQuatters-Gollop et al.,  
479 2019). Using a diversity of metrics may be necessary to assess multiple important aspects of an  
480 intervention's effectiveness, but a lack of consistency in the metrics used to report results often  
481 makes the evidence base difficult to synthesize - especially if different metrics yield different  
482 results (Mace & Baillie, 2007). Prioritisation of the most relevant metrics of effectiveness for  
483 different interventions with input from decision-makers and practitioners is essential to facilitate  
484 inter-study comparisons (McQuatters-Gollop et al., 2019). Initiatives aiming to do this are  
485 underway in topics such as fishery habitats (Lederhouse & Link, 2016) and protected areas  
486 (Nolte & Agrawal, 2013; Pomeroy, Parks, & Watson, 2004), and are supported by the Essential  
487 Biodiversity Variables framework (Jetz et al., 2019). Funders could help strengthen these efforts  
488 by requiring grantees to follow such initiatives and use consistent metrics when evaluating  
489 interventions.

490  
491 Increasing the size and quality of the evidence base for conservation decision-making will be a  
492 slow process, but conservation practitioners need to make decisions now. Until the evidence  
493 base improves, excluding studies from evidence syntheses because they do not meet certain  
494 quality or relevance criteria could lead to little or no evidence being used to inform conservation  
495 efforts (Davies & Gray, 2015; Gurevitch & Hedges, 1999; Lortie, Stewart, Rothstein, & Lau,  
496 2015). Moreover, studies that do not meet these criteria may still provide useful evidence,

497 particularly in the absence of more relevant and robust studies (Burivalova et al., 2019; Cook,  
498 Mascia, Schwartz, Possingham, & Fuller, 2013; Gough & White, 2018).

499  
500 Therefore, we need novel approaches to rigorously synthesizing studies that vary considerably  
501 in their relevance and robustness to maximize the use of the current imperfect evidence base.  
502 We believe that weighting approaches in both quantitative meta-analyses and more qualitative  
503 evidence synthesis would help maximize the number of studies available, while giving greater  
504 influence to studies with desirable characteristics. This could involve giving greater influence to  
505 more robustly designed studies (e.g., using accuracy weights from Christie, Amano, Martin,  
506 Shackelford, et al. 2019 and evidence hierarchies from Mupepele, Walsh, Sutherland, &  
507 Dormann 2016), and giving more weight to more relevant studies (e.g., weighting by the  
508 relevance of studies to a decision-maker's local context, as proposed in healthcare by Kneale,  
509 Thomas, O'Mara-Eves, & Wiggins 2019). To generate objective weights of study relevance that  
510 reflect the likely generalizability of study results, we need studies which help us to understand  
511 how generalizability varies between interventions for different ecological (e.g., artificial nest  
512 boxes; Finch et al. 2019), socioeconomic, and political contexts. Understanding why some  
513 interventions work in certain contexts and not others is fundamentally important for evidence-  
514 based decision-makers (Grant et al., 2019).

515  
516 Overall, we have shown that the evidence base for conservation does not reflect the needs of  
517 conservation. When this is combined with the general paucity of robust studies testing  
518 conservation interventions, we conclude that there is a serious lack of locally relevant and  
519 robust studies to inform decision-making in conservation. We hope that the conservation  
520 community can work together to improve the state of the conservation evidence base. Doing so  
521 will require much greater collaboration between research and practice. Testing interventions  
522 needs to become more routine, use a more standardized suite of metrics and robust study  
523 designs, and, most importantly, focus on the locations and taxa where evidence is most needed  
524 to inform conservation action. In the meantime, we need to explore ways to better analyze the  
525 current patchy evidence base of conservation and ensure that we can support the shift towards  
526 more evidence-based policy and practice.

527

## 528 **Acknowledgements and Data**

529 We would like to thank Anne Mupepele for their useful comments on the manuscript and all past  
530 and present members of the Conservation Evidence project. All data analyzed in this study and  
531 code to repeat analyses are available from <https://doi.org/10.5281/zenodo.3634780>.

532

## 533 **Author funding sources**

534 TA was supported by the Grantham Foundation for the Protection of the Environment, the  
535 Kenneth Miller Trust and the Australian Research Council Future Fellowship (FT180100354);  
536 WJS, PAM, CFRW, SOP and GES are supported by Arcadia and The David and Claudia



537 Harding Foundation; RKS was supported by the MAVA Foundation; BIS and APC were  
538 supported by the Natural Environment Research Council as part of the Cambridge Earth  
539 System Science NERC DTP [NE/L002507/1]. BIS is also supported by the Natural Environment  
540 Research Council [NE/S001395/1] and a Royal Commission for the Exhibition of 1851 Research  
541 Fellowship.

542

## 543 **References**

544

- 545 1. Addison, P. F. E., Cook, C. N., & de Bie, K. (2016). Conservation practitioners'  
546 perspectives on decision triggers for evidence-based management. *Journal of*  
547 *Applied Ecology*, 53(5), 1351–1357. <https://doi.org/10.1111/1365-2664.12734>
- 548 2. Amano, T., González-Varo, J. P., & Sutherland, W. J. (2016). Languages Are Still  
549 a Major Barrier to Global Science. *PLOS Biology*, 14(12), e2000933. Retrieved  
550 from <https://doi.org/10.1371/journal.pbio.2000933>
- 551 3. Amano, T., & Sutherland, W. J. (2013). Four barriers to the global understanding  
552 of biodiversity conservation: wealth, language, geographical location and  
553 security. *Proceedings of the Royal Society B: Biological Sciences*, 280(1756),  
554 20122649.
- 555 4. Baylis, K., Honey-ros, J., Corbera, E., Ezzine-de-blas, D., Ferraro, P. J., Jan, B.,  
556 ... Wunder, S. (2016). *Mainstreaming Impact Evaluation in Nature Conservation*  
557 3. 9(February), 58–64. <https://doi.org/10.1111/conl.12180>
- 558 5. Begley, C. G., & Ioannidis, J. P. A. (2015). *Review Reproducibility in Science*  
559 *Improving the Standard for Basic and Preclinical Research*. 116–126.  
560 <https://doi.org/10.1161/CIRCRESAHA.114.303819>
- 561 6. Bivand, R., Keitt, T., & Rowlingson, B. (2019). *rgdal: Bindings for the “Geospatial”*  
562 *Data Abstraction Library R package version 1.4-8*. Retrieved from [https://cran.r-](https://cran.r-project.org/package=rgdal)  
563 [project.org/package=rgdal](https://cran.r-project.org/package=rgdal)
- 564 7. Bivand, R., & Rundel, C. (2019). *rgeos: Interface to Geometry Engine - Open*  
565 *Source (“GEOS”). R package version 0.5-2*. Retrieved from [https://cran.r-](https://cran.r-project.org/package=rgeos%0A)  
566 [project.org/package=rgeos%0A](https://cran.r-project.org/package=rgeos%0A)
- 567 8. Bivand, R. S., Pebesma, E., & Gomez-Rubio, V. (2013). *Applied spatial data*  
568 *analysis with R* (Second). Retrieved from <http://www.asdar-book.org/>
- 569 9. Brawn, J. D., & Balda, R. P. (1988). Population biology of cavity nesters in  
570 northern Arizona: do nest sites limit breeding densities? *The Condor*, 90(1), 61–  
571 71.
- 572 10. British Ecological Society. (2020). Applied Ecological Resources repository and  
573 Ecological Solutions and Evidence journal. Retrieved January 10, 2020, from  
574 <https://besjournals.onlinelibrary.wiley.com/journal/26888319>
- 575 11. Browne, S. J. (2006). Effect of nestbox construction and colour on the occupancy  
576 and breeding success of nesting tits *Parus* spp. *Bird Study*, 53(2), 187–192.
- 577 12. Burivalova, Z., Allnutt, T., Rademacher, D., Schlemm, A., Wilcove, D. S., &  
578 Butler, R. A. (2019). What works in tropical forest conservation, and what does  
579 not: Effectiveness of four strategies in terms of environmental, social, and  
580 economic outcomes. *Conservation Science and Practice*, in press(March), 1–15.  
581 <https://doi.org/10.1111/csp2.28>

- 582 13. Caine, L. A., & Marion, W. R. (1991). Artificial Addition of Snags and Nest Boxes  
583 to Slash Pine Plantations (Colocacion de maderos y cajas de anidamiento en  
584 plantaciones de *Pinus elliottii*). *Journal of Field Ornithology*, 97–106.
- 585 14. Capmourteres, V., & Anand, M. (2016). “Conservation value”: a review of the  
586 concept and its quantification. *Ecosphere*, 7(10), e01476.  
587 <https://doi.org/10.1002/ecs2.1476>
- 588 15. Catalano, A. S., Lyons-White, J., Mills, M. M., & Knight, A. T. (2019). Learning  
589 from published project failures in conservation. *Biological Conservation*, 238,  
590 108223. <https://doi.org/https://doi.org/10.1016/j.biocon.2019.108223>
- 591 16. Christie, A. P., Amano, T., Martin, P. A., Petrovan, S. O., Shackelford, G. E.,  
592 Simmons, B. I., ... Sutherland, W. J. (2019). The challenge of heterogeneous  
593 evidence in conservation. *BioRxiv*, 797639. <https://doi.org/10.1101/797639>
- 594 17. Christie, A. P., Amano, T., Martin, P. A., Shackelford, G. E., Simmons, B. I., &  
595 Sutherland, W. J. (2019). Simple study designs in ecology produce inaccurate  
596 estimates of biodiversity responses. *Journal of Applied Ecology*, 56(12), 2742–  
597 2754. <https://doi.org/10.1111/1365-2664.13499>
- 598 18. Conservation Evidence. (2020a). Conservation Evidence. Retrieved February 4,  
599 2020, from [www.conservationevidence.com](http://www.conservationevidence.com)
- 600 19. Conservation Evidence. (2020b). Conservation Evidence journal. Retrieved from  
601 <https://www.conservationevidence.com/collection/view>
- 602 20. Cook, C. N., Mascia, M. B., Schwartz, M. W., Possingham, H. P., & Fuller, R. A.  
603 (2013). Achieving Conservation Science that Bridges the Knowledge–Action  
604 Boundary. *Conservation Biology*, 27(4), 669–678.  
605 <https://doi.org/10.1111/cobi.12050>
- 606 21. Cook, C. N., Possingham, H. P., & Fuller, R. A. (2013). Contribution of  
607 Systematic Reviews to Management Decisions. *Conservation Biology*, 27(5),  
608 902–915. <https://doi.org/10.1111/cobi.12114>
- 609 22. Cook, C. N., & Sgrò, C. M. (2017). Aligning science and policy to achieve  
610 evolutionarily enlightened conservation. *Conservation Biology*, 31(3), 501–512.  
611 <https://doi.org/10.1111/cobi.12863>
- 612 23. Davies, G. M., & Gray, A. (2015). Don’t let spurious accusations of  
613 pseudoreplication limit our ability to learn from natural experiments (and other  
614 messy kinds of ecological monitoring). *Ecology and Evolution*, 5(22), 5295–5304.  
615 <https://doi.org/10.1002/ece3.1782>
- 616 24. De Palma, A., Sanchez-Ortiz, K., Martin, P. A., Chadwick, A., Gilbert, G., Bates,  
617 A. E., ... Purvis, A. (2018). Challenges With Inferring How Land-Use Affects  
618 Terrestrial Biodiversity: Study Design, Time, Space and Synthesis. In *Next*  
619 *Generation Biomonitoring: Part 1* (1st ed., pp. 163–199). Elsevier Ltd.
- 620 25. Dinerstein, E., Olson, D., Joshi, A., Vynne, C., Burgess, N. D., Wikramanayake,  
621 E., ... Saleem, M. (2017). An Ecoregion-Based Approach to Protecting Half the  
622 Terrestrial Realm. *BioScience*, 67(6), 534–545.  
623 <https://doi.org/10.1093/biosci/bix014>
- 624 26. Dirzo, R., Young, H. S., Galetti, M., Ceballos, G., Isaac, N. J. B., & Collen, B.  
625 (2014). Defaunation in the Anthropocene. *Science*, 345(6195), 401–406.  
626 <https://doi.org/10.1126/science.1251817>
- 627 27. Donaldson, M. R., Burnett, N. J., Braun, D. C., Suski, C. D., Hinch, S. G., Cooke,

- 628 S. J., & Kerr, J. T. (2016). Taxonomic bias and international biodiversity  
629 conservation research. *FACETS*, 1(1), 105–113. [https://doi.org/10.1139/facets-](https://doi.org/10.1139/facets-2016-0011)  
630 2016-0011
- 631 28. Fazey, I., Fischer, J., & Lindenmayer, D. B. (2005). What do conservation  
632 biologists publish? *Biological Conservation*, 124(1), 63–73.  
633 <https://doi.org/https://doi.org/10.1016/j.biocon.2005.01.013>
- 634 29. Finch, T., Branston, C., Clewlow, H., Dunning, J., Franco, A. M. A., Račinskis, E.,  
635 ... Butler, S. J. (2019). Context-dependent conservation of the cavity-nesting  
636 European Roller. *Ibis*, 161(3), 573–589. <https://doi.org/10.1111/ibi.12650>
- 637 30. Geijzendorffer, I. R., van Teeffelen, A. J. A., Allison, H., Braun, D., Horgan, K.,  
638 Iturrate-Garcia, M., ... Quatrini, S. (2017). How can global conventions for  
639 biodiversity and ecosystem services guide local conservation actions? *Current*  
640 *Opinion in Environmental Sustainability*, 29, 145–150.
- 641 31. Gough, D., & White, H. (2018). *Evidence standards and evidence claims in web*  
642 *based research portals*. Retrieved from [https://uploads-](https://uploads-ssl.webflow.com/59f07e67422cdf0001904c14/5bffe39daf9c956d0815519_CFH1_EVIDENCE_STANDARDS_REPORT_V14_WEB.pdf)  
643 [ssl.webflow.com/59f07e67422cdf0001904c14/5bffe39daf9c956d0815519\\_CFH1](https://uploads-ssl.webflow.com/59f07e67422cdf0001904c14/5bffe39daf9c956d0815519_CFH1_EVIDENCE_STANDARDS_REPORT_V14_WEB.pdf)  
644 [\\_EVIDENCE\\_STANDARDS\\_REPORT\\_V14\\_WEB.pdf](https://uploads-ssl.webflow.com/59f07e67422cdf0001904c14/5bffe39daf9c956d0815519_CFH1_EVIDENCE_STANDARDS_REPORT_V14_WEB.pdf)
- 645 32. Grant, E. H. C., Muths, E., Schmidt, B. R., & Petrovan, S. O. (2019). Amphibian  
646 conservation in the Anthropocene. *Biological Conservation*, 236, 543–547.  
647 <https://doi.org/https://doi.org/10.1016/j.biocon.2019.03.003>
- 648 33. Gurevitch, J., & Hedges, L. V. (1999). Statistical issues in ecological  
649 meta-analyses. *Ecology*, 80(4), 1142–1149.
- 650 34. Helldin, J. O., & Petrovan, S. O. (2019). Effectiveness of small road tunnels and  
651 fences in reducing amphibian roadkill and barrier effects at retrofitted roads in  
652 Sweden. *PeerJ*, 7, e7518. <https://doi.org/10.7717/peerj.7518>
- 653 35. Hickisch, R., Hodgetts, T., Johnson, P. J., Sillero-Zubiri, C., Tockner, K., &  
654 Macdonald, D. W. (2019). Effects of publication bias on conservation planning.  
655 *Conservation Biology*, 33(5), 1151–1163. <https://doi.org/10.1111/cobi.13326>
- 656 36. Hijmans, R. J. (2017). *geosphere: Spherical Trigonometry. R package version*  
657 *1.5-7*. Retrieved from <https://cran.r-project.org/package=geosphere>
- 658 37. IUCN. (2019). IUCN Red List. Retrieved November 12, 2019, from  
659 <https://www.iucnredlist.org/>
- 660 38. Jetz, W., McGeoch, M. A., Guralnick, R., Ferrier, S., Beck, J., Costello, M. J., ...  
661 Merow, C. (2019). Essential biodiversity variables for mapping and monitoring  
662 species populations. *Nature Ecology & Evolution*, 3(4), 539–551.
- 663 39. Kneale, D., Thomas, J., O'Mara-Eves, A., & Wiggins, R. (2019). How can  
664 additional secondary data analysis of observational data enhance the  
665 generalisability of meta-analytic evidence for local public health decision making?  
666 *Research Synthesis Methods*, 10(1), 44–56. <https://doi.org/10.1002/jrsm.1320>
- 667 40. Lederhouse, T., & Link, J. S. (2016). A Proposal for Fishery Habitat Conservation  
668 Decision-Support Indicators. *Coastal Management*, 44(3), 209–222.  
669 <https://doi.org/10.1080/08920753.2016.1163176>
- 670 41. Lortie, C. J., Stewart, G., Rothstein, H., & Lau, J. (2015). How to critically read  
671 ecological meta-analyses. *Research Synthesis Methods*, 6(2), 124–133.  
672 <https://doi.org/10.1002/jrsm.1109>
- 673 42. Mace, G. M., & Baillie, J. E. M. (2007). The 2010 biodiversity indicators:

- 674 challenges for science and policy. *Conservation Biology*, 21(6), 1406–1413.
- 675 43. Male, S. K., Jones, J., & Robertson, R. J. (2006). Effects of nest-box density on  
676 the behavior of Tree Swallows during nest building. *Journal of Field Ornithology*,  
677 77(1), 61–66.
- 678 44. Marshall, E., Wintle, B. A., Southwell, D., & Kujala, H. (2019). What are we  
679 measuring? A review of metrics used to describe biodiversity in offsets  
680 exchanges. *Biological Conservation*, 108250.  
681 <https://doi.org/https://doi.org/10.1016/j.biocon.2019.108250>
- 682 45. McQuatters-Gollop, A., Mitchell, I., Vina-Herbon, C., Bedford, J., Addison, P. F.  
683 E., Lynam, C. P., ... Otto, S. A. (2019). From Science to Evidence – How  
684 Biodiversity Indicators Can Be Used for Effective Marine Conservation Policy and  
685 Management . *Frontiers in Marine Science* , Vol. 6, p. 109. Retrieved from  
686 <https://www.frontiersin.org/article/10.3389/fmars.2019.00109>
- 687 46. Mupepele, A.-C., Walsh, J. C., Sutherland, W. J., & Dormann, C. F. (2016). An  
688 evidence assessment tool for ecosystem services and conservation studies.  
689 *Ecological Applications*, 26(5), 1295–1301. <https://doi.org/10.1890/15-0595>
- 690 47. Murray, H. J., Green, E. J., Williams, D. R., Burfield, I. J., & de Brooke, M. L.  
691 (2015). Is research effort associated with the conservation status of European  
692 bird species? *Endangered Species Research*, 27(3), 193–206.  
693 <https://doi.org/10.3354/esr00656>
- 694 48. Nolte, C., & Agrawal, A. (2013). Linking Management Effectiveness Indicators to  
695 Observed Effects of Protected Areas on Fire Occurrence in the Amazon  
696 Rainforest. *Conservation Biology*, 27(1), 155–165. <https://doi.org/10.1111/j.1523-1739.2012.01930.x>
- 698 49. Nosek, B. A., & Errington, T. M. (2017). Making sense of replications. *ELife*, 6,  
699 e23383. <https://doi.org/10.7554/eLife.23383>
- 700 50. Open Science Collaboration. (2015). Estimating the reproducibility of  
701 psychological science. *Science*, 349(6251), aac4716.  
702 <https://doi.org/10.1126/science.aac4716>
- 703 51. OpenStreetMap. (2019). Retrieved December 14, 2019, from  
704 <http://openstreetmapdata.com/data/land-polygons>
- 705 52. Pebesma, E. J., & Bivand, R. S. (2005). Classes and methods for spatial data in  
706 R. *R News*, 5(2).
- 707 53. Pomeroy, R. S., Parks, J. E., & Watson, L. M. (2004). *How is your MPA doing?: a*  
708 *guidebook of natural and social indicators for evaluating marine protected area*  
709 *management effectiveness*. IUCN.
- 710 54. Purcell, K. L., Verner, J., & Lewis W, O. (1997). A comparison of the breeding  
711 ecology of birds nesting in boxes and tree cavities. *The Auk*, 114(4), 646–656.
- 712 55. R Core Team. (2019). *R: A language and environment for statistical computing*.  
713 *R Foundation for Statistical Computing*. Retrieved from <https://www.r-project.org/>
- 714 56. Reboledo Segovia, A. L., Romano, D., & Armsworth, P. R. (2020). Who studies  
715 where? Boosting tropical conservation research where it is most needed.  
716 *Frontiers in Ecology and the Environment*, fee.2146.  
717 <https://doi.org/10.1002/fee.2146>
- 718 57. Rosenberg, K. V., Dokter, A. M., Blancher, P. J., Sauer, J. R., Smith, A. C., Smith,  
719 P. A., ... Marra, P. P. (2019). Decline of the North American avifauna. *Science*,

- 720           eaaw1313. <https://doi.org/10.1126/science.aaw1313>
- 721       58. Slavin, R. E. (1995). Best evidence synthesis: An intelligent alternative to meta-
- 722           analysis. *Journal of Clinical Epidemiology*, 48(1), 9–18.
- 723           [https://doi.org/10.1016/0895-4356\(94\)00097-A](https://doi.org/10.1016/0895-4356(94)00097-A)
- 724       59. Smith, R. K., & Sutherland, W. J. (2014). *Amphibian conservation: global*
- 725           *evidence for the effects of interventions* (Vol. 4). Pelagic Publishing Ltd.
- 726       60. Society for Conservation Biology. (2020). Conservation Science and Practice.
- 727           Retrieved January 10, 2020, from
- 728           <https://conbio.onlinelibrary.wiley.com/journal/25784854>
- 729       61. Spake, R., & Doncaster, C. P. (2017). Use of meta-analysis in forest biodiversity
- 730           research: key challenges and considerations. *Forest Ecology and Management*,
- 731           400, 429–437. <https://doi.org/10.1016/j.foreco.2017.05.059>
- 732       62. Spooner, F., Smith, R. K., & Sutherland, W. J. (2015). Trends, biases and
- 733           effectiveness in reported conservation interventions. *Conservation Evidence*, 12,
- 734           2–7.
- 735       63. Sutherland, W. J., Pullin, A. S., Dolman, P. M., & Knight, T. M. (2004). The need
- 736           for evidence-based conservation. *Trends in Ecology & Evolution*, 19(6), 305–308.
- 737       64. Sutherland, W. J., Taylor, N. G., MacFarlane, D., Amano, T., Christie, A. P.,
- 738           Dicks, L. V., ... Wordley, C. F. R. (2019). Building a tool to overcome barriers in
- 739           research-implementation spaces: The Conservation Evidence database.
- 740           *Biological Conservation*, 238, 108199.
- 741           <https://doi.org/10.1016/j.biocon.2019.108199>
- 742       65. TRANSLATE. (2020). TRANSLATE - Transcending Language Barriers to
- 743           Environmental Sciences. Retrieved January 11, 2020, from
- 744           <https://researchers.uq.edu.au/research-project/35572>
- 745       66. Tugwell, P., & Haynes, R. B. (2006). Assessing claims of causation. *Clinical*
- 746           *Epidemiology: How to Do Clinical Practice Research*, 356–387.
- 747       67. Whittaker, R. J. (2010). Meta-analyses and mega-mistakes: calling time on
- 748           meta-analysis of the species richness–productivity relationship. *Ecology*, 91(9),
- 749           2522–2533.
- 750       68. Williams, D. R., Balmford, A., & Wilcove, D. S. (n.d.). The past and future role of
- 751           conservation science in protecting biodiversity. In *Conservation Letters*.
- 752       69. Williams, D. R., Pople, R. G., Showler, D. A., Dicks, L. V, Child, M. F., Zu
- 753           Ermgassen, E. K. H. J., & Sutherland, W. J. (2013). *Bird Conservation: Global*
- 754           *evidence for the effects of interventions* (Vol. 2). Pelagic Publishing.
- 755       70. Wilson, K. A., Auerbach, N. A., Sam, K., Magini, A. G., Moss, A. S. L., Langhans,
- 756           S. D., ... Meijaard, E. (2016). Conservation Research Is Not Happening Where It
- 757           Is Most Needed. *PLOS Biology*, 14(3), e1002413. Retrieved from
- 758           <https://doi.org/10.1371/journal.pbio.1002413>
